# Supplementary material for: Molecular gate effects observed in fluoroalkylsilane self-assembled monolayers grafted on LiNi0.5Mn1.5O4cathodes: an application to efficient ion-exchange reactions
Source: Royal Society of Chemistry journal article supplement (doi:10.1039/d1ma00426c), 2021-01-01
Supplement: d1ma00426c1.pdf [file d1ma00426c1.pdf]

Supporting Information:

## Molecular gate effects in fluoroalkylsilane self-assembled monolayer grafted on $\text{LiNi}_{0.5}\text{Mn}_{1.5}\text{O}_4$ cathodes: Toward efficient ion-exchanging reaction

Youn Charles-Blin<sup>a</sup>, Hitomi Todoki<sup>a</sup>, Nobuyuki Zettsu<sup>\*a,b</sup>, and Katsuya Teshima<sup>a,b</sup>

<sup>1</sup>Department of Materials Chemistry, Faculty of Engineering, Shinshu University, 4-17-1 Wakasato, Nagano, 380-8553, Japan.

<sup>2</sup>Center for Energy & Environmental Science, Shinshu University, 4-17-1 Wakasato, Nagano, 380-8553, Japan.

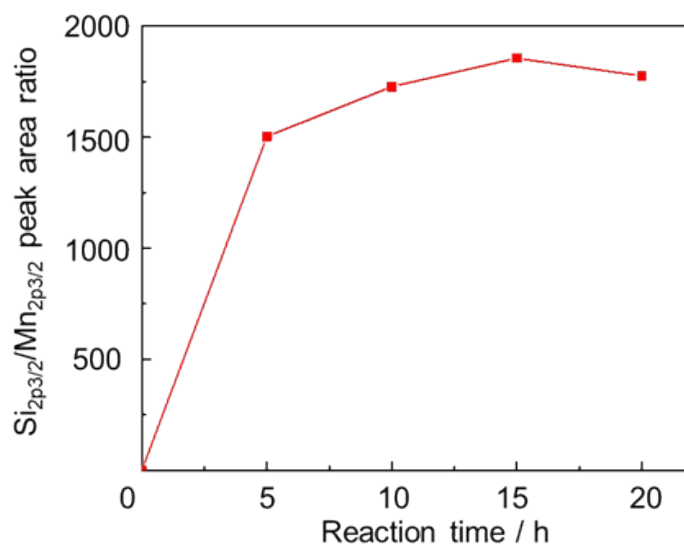

Figure S1.

The changes in the peak area ratio of  $\text{Si}_{2p_{3/2}}/\text{Mn}_{2p_{3/2}}$  with increase of the time. The peak area ratio became constant after 15h. It suggests that the LNMO surface was densely covered with FAS monolayer based on Langmuir type adsorption theory.

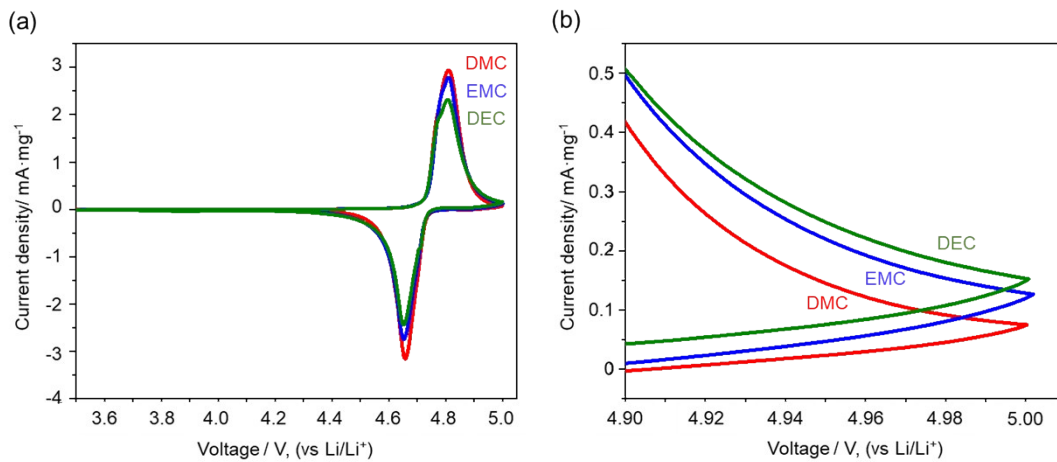

Figure S2.

Cyclic voltammograms of the FAS-13 monolayer immobilized LNMO electrodes ||1M LiPF<sub>6</sub>, EC-non cyclic carbonates (DMC, EMC, and DEC) ||Li half-cells with various non-cyclic carbonates. Sweep rate is 0.1 mV·s<sup>-1</sup>.

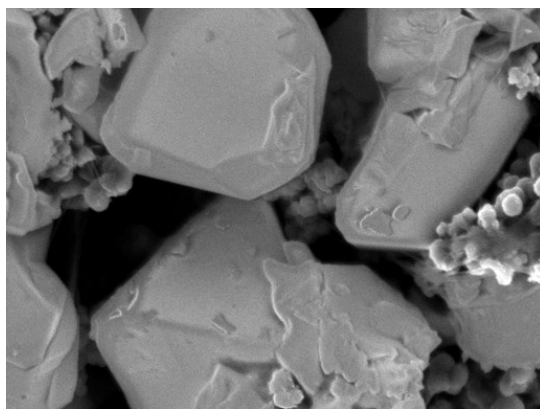

Figure S3: FE-SEM images of the surface of the bare LNMO cathode before cycling. Scale bar is 1.0  $\mu\text{m}$ .

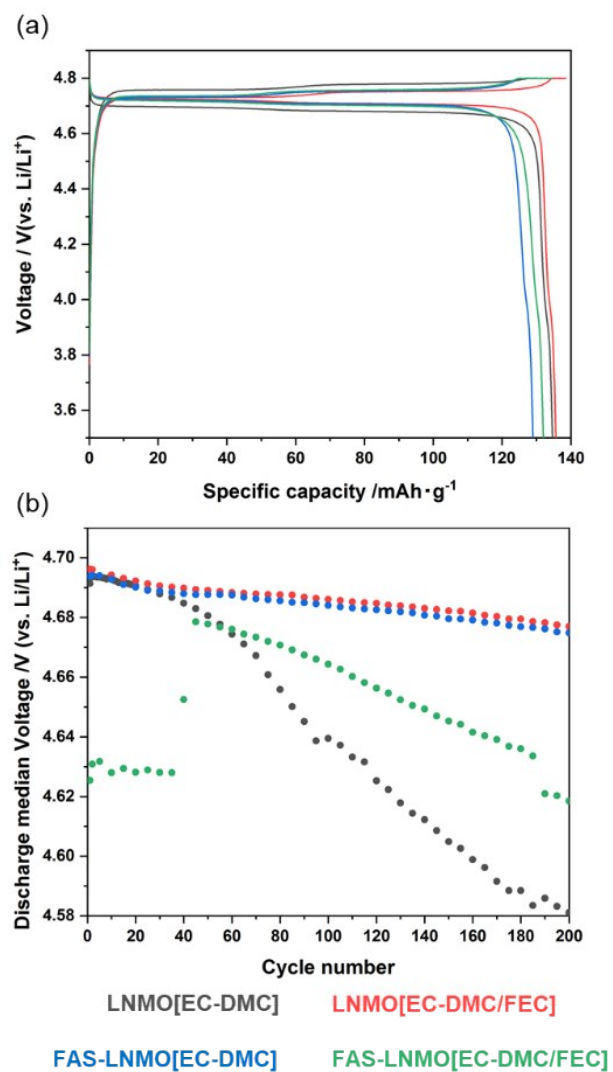

Figure S4: a) Galvanostatic charge/discharge curves of the first cycle in half-cell at 2C and 50°C, b) Discharge median voltage against cycle number.

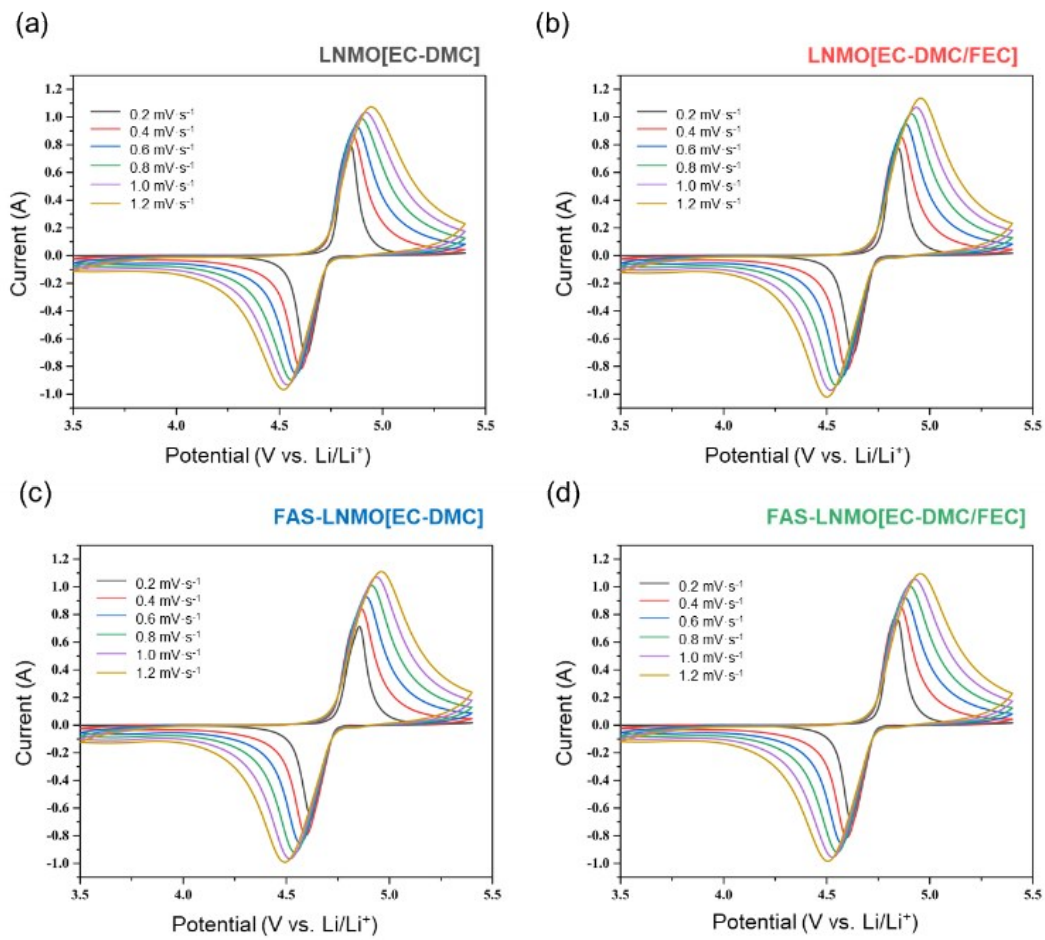

Figure S5: Cyclic-voltammograms taken at different sweep rates for a) LNMO(EC-DMC), b) FAS-LNMO(EC-DMC), c) LNMO(EC-DMC/FEC), d) FAS-LNMO(EC-DMC/FEC).
